1 **Title:** Rationally designed immunogens enable immune focusing to the SARS-CoV-2 receptor  
2 binding motif  
3

4  
5 **Authors:** Blake M. Hauser<sup>1</sup>, Maya Sangesland<sup>1#</sup>, Kerri J. St. Denis<sup>1#</sup>, Ian W. Windsor<sup>1,2,3#</sup>, Jared  
6 Feldman<sup>1</sup>, Evan C. Lam<sup>1</sup>, Ty Kannegieter<sup>1</sup>, Alejandro B. Balazs<sup>1</sup>, Daniel Lingwood<sup>1</sup>, Aaron G.  
7 Schmidt<sup>1,4\*</sup>  
8  
9

10 <sup>1</sup>Ragon Institute of MGH, MIT and Harvard, Cambridge, MA, 02139, USA  
11

12 <sup>2</sup>Department of Biological Chemistry and Molecular Pharmacology, Harvard Medical School,  
13 Boston, MA 02115, USA  
14

15 <sup>3</sup>Laboratory of Molecular Medicine, Boston Children's Hospital, Boston, MA, USA  
16

17 <sup>4</sup>Department of Microbiology, Harvard Medical School, Boston, MA 02115, USA  
18  
19

20 #These authors contributed equally.  
21  
22

23 **Key words:** immunogen design, glycan, immune focusing, SARS-CoV-2, coronavirus  
24  
25

26 **Correspondence:**

27 Aaron G. Schmidt

28 Tel: 857-268-7118; E-mail: [aschmidt@crystal.harvard.edu](mailto:aschmidt@crystal.harvard.edu)  
29  
30  
31

32 **ABSTRACT**

33 Eliciting antibodies to surface-exposed viral glycoproteins can lead to protective responses that  
34 ultimately control and prevent future infections. Targeting functionally conserved epitopes may  
35 help reduce the likelihood of viral escape and aid in preventing the spread of related viruses with  
36 pandemic potential. One such functionally conserved viral epitope is the site to which a receptor  
37 must bind to facilitate viral entry. Here, we leveraged rational immunogen design strategies to  
38 focus humoral responses to the receptor binding motif (RBM) on the SARS-CoV-2 spike. Using  
39 glycan engineering and epitope scaffolding, we find an improved targeting of the serum response  
40 to the RBM in context of SARS-CoV-2 spike imprinting. Furthermore, we observed a robust  
41 SARS-CoV-2-neutralizing serum response with increased potency against related sarbecoviruses,  
42 SARS-CoV, WIV1-CoV, RaTG13-CoV, and SHC014-CoV. Thus, RBM focusing is a promising  
43 strategy to elicit breadth across emerging sarbecoviruses and represents an adaptable design  
44 approach for targeting conserved epitopes on other viral glycoproteins.

45

46 **One Sentence Summary:** SARS-CoV-2 immune focusing with engineered immunogens

47

## 48 MAIN TEXT

49 Humoral responses elicited by vaccination or infection predominantly target surface-exposed viral  
50 glycoproteins. These responses can often provide protection against future infections to the same  
51 or closely related viral variants. However, in some instances, such as influenza and HIV, the  
52 elicited responses are often poorly protective as they target variable epitopes (1, 2). Furthermore,  
53 waning of responses (*i.e.*, durability), as is the case for common cold-causing coronaviruses,  
54 results in susceptibility to reinfections (3-6). For SARS-CoV-2 (SARS-2) it remains unclear  
55 whether current vaccines will confer long-term protection. Furthermore, it is increasingly apparent  
56 that humoral immunity elicited by vaccination or natural infection may provide reduced protection  
57 against emerging SARS-2 variants (7-12). Thus, implementing rational design strategies aimed at  
58 directing the immune response to conserved viral epitopes may help reduce the likelihood of viral  
59 escape and lead to more broadly protective responses (13, 14).

60

61 Two immunogen design strategies used to direct humoral responses include “masking” epitopes  
62 via engineering putative N-linked glycosylation sites (PNGs) and the design of protein scaffolds  
63 to present broadly protective epitopes (15, 16); these strategies have been used previously for viral  
64 glycoproteins RSV F, influenza hemagglutinin and HIV envelope (17-19). Applying these  
65 approaches to the SARS-2 spike provides an opportunity to potentially improve serum  
66 neutralization potency, efficacy against variants, and cross-reactivity of antibody responses. A  
67 potential target of these efforts is the angiotensin converting enzyme 2 (ACE2) receptor binding  
68 motif (RBM) of the receptor binding domain (RBD) (20, 21). Indeed, several potentially neutralizing  
69 RBM-directed antibodies that interfere with ACE2 binding are protective and some can also  
70 neutralize related sarbecoviruses (13, 14, 21-23). Here, we show that hyperglycosylation of the  
71 RBD and a “resurfacing” approach that grafts the RBM from SARS-2 onto heterologous  
72 coronavirus RBDs focuses serum responses to the RBM. This immune-focused response is  
73 potentially neutralizing with breadth across SARS-2 variants and other coronaviruses.

74

75 The RBM of SARS-2 and related sarbecoviruses, SARS-CoV (SARS-1) and WIV1-CoV (WIV1),  
76 is a contiguous sequence spanning residues 437-507 (SARS-2 numbering) of the spike protein. In  
77 an effort to elicit RBM-specific responses only, we first asked whether the RBM itself could be  
78 recombinantly expressed in absence of the rest of the RBD (Fig. 1A). While the SARS-2 RBM

79 could indeed be overexpressed, it failed to both engage the conformationally-specific RBM-  
80 directed antibody B38 and bind to cell-surface expressed ACE2 (**Fig. S1**). These results likely  
81 suggest that the RBM is conformationally flexible, and that the RBD serves as a structural  
82 “scaffold” to stabilize the RBM in its binding-compatible conformation. To circumvent the  
83 considerable hurdle of *de novo* scaffold design for RBM presentation, we asked whether  
84 heterologous sarbecovirus RBDs from SARS-1 and WIV1 and the more distantly related  
85 merbecovirus MERS-CoV (MERS) could serve as scaffolds (**Fig. 1A**) —variations of this  
86 approach were used previously to modulate ACE2 binding properties (24, 25). In context of  
87 immunizations, we hypothesized that these heterologous RBDs would present the SARS-2 RBM  
88 while removing any other SARS-2-specific epitopes. The SARS-1, WIV1 and MERS RBDs share  
89 a pairwise amino acid identity with SARS-2 of 73.0%, 75.4% and 19.5%, respectively. The RBM  
90 is less conserved despite have a shared ACE2 receptor for SARS-1 and WIV1 with only 49.3%  
91 and 52.1% identity, respectively; as MERS uses DPP4 as a receptor, its RBM shares no notable  
92 identity (26). While we were unable to “resurface” MERS RBD with the SARS-2 RBM, the related  
93 SARS-1 and WIV1 RBDs successfully accepted the RBM transfer. These resurfaced constructs,  
94 rsSARS-1 and rsWIV1 retained binding to the SARS-2 RBM-specific B38 antibody as well as  
95 effectively engaged ACE2 (**Fig. S2**) (22). These data suggest that there are sequence and structural  
96 constraints within the RBD required for successful RBM grafting; such an approach may be  
97 facilitated by using CoV RBDs that use the same receptor for viral entry.

98

99 We next used these resurfaced RBDs as templates for further modification using glycan  
100 engineering. This approach aimed to mask conserved, cross-reactive epitopes shared between the  
101 SARS-1, SARS-2, and WIV1 RBDs. There are two evolutionarily conserved PNGs at positions  
102 331 and 343; SARS-1 and WIV1 have an additional conserved PNG at position 370 (SARS-2  
103 numbering). To further increase overall surface glycan density, we introduced novel PNGs onto  
104 wildtype SARS-2 as well as rsSARS-1 and rsWIV1 RBDs. Based on structural modeling and  
105 biochemical validation, we identified 5 potential sites on rsSARS-1 and rsWIV1 as well as 6 on  
106 SARS-2. Including the native PNGs, all constructs had a total of 8 glycans (**Fig. 1B-D, S3-4**)—  
107 we denote these hyperglycosylated (hg) constructs as SARS-2<sup>hg</sup>, rsSARS-1<sup>hg</sup>, and rsWIV1<sup>hg</sup>. We  
108 expressed these constructs in mammalian cells to ensure complex glycosylation in order to  
109 maximize any glycan “shielding” effect. We subsequently characterized these constructs using the

110 RBM-directed antibody B38, as well as ACE2 binding, to ensure that the engineered PNGs did  
111 not adversely affect the RBM conformation. Overall, the hyperglycosylated constructs were  
112 largely comparable in affinity for B38, with only ~2-fold decrease, and still effectively engaged  
113 ACE2 (**Fig. S5**). These results confirm a conformational and functionally intact RBM.

114

115 Next, we assessed whether the engineered PNGs abrogated binding to sarbecovirus cross-reactive  
116 antibodies S309 and CR3022—both antibodies were isolated from SARS-1 convalescent  
117 individuals (27, 28). The CR3022 contact residues on SARS-1 and WIV1 differ only at a single  
118 residue while SARS-2 differs at 5 residues across both CR3022 and S309 epitopes (29).  
119 Importantly, these epitopic regions were shown to be a significant portion of the SARS-2 RBD-  
120 directed response in murine immunizations and thus any RBM focusing would require masking of  
121 these regions (**Fig. S5**) (27, 28, 30). While SARS-2<sup>hg</sup> effectively abrogated S309 and CR3022  
122 binding, the engineered PNGs at the antibody:antigen interface on rsSARS-1<sup>hg</sup> and rsWIV1<sup>hg</sup> did  
123 not completely abrogate S309 and CR3022 binding. We therefore incorporated unique mutations  
124 on rsSARS-1<sup>hg</sup> and rsWIV1<sup>hg</sup> so that any elicited antibodies would be less likely to cross-react  
125 between these two constructs. To that end, we found K378A and the engineered glycan at residue  
126 383 (SARS-2 numbering) completely abrogated CR3022 binding in both rsSARS-1<sup>hg</sup> and  
127 rsWIV1<sup>hg</sup> (**Fig. S5**). For S309, mutations P337D in rsSARS-1<sup>hg</sup> and G339W in rsWIV1<sup>hg</sup> in  
128 addition to glycans at residues 441 and 354 (SARS-2 numbering) were sufficient to disrupt binding  
129 (**Fig. S5**). We made two additional mutations, G381R, M430K on rsSARS-1<sup>hg</sup> and K386A, T430R  
130 on rsWIV1<sup>hg</sup>, to further increase the antigenic distance between these scaffolds (**Fig. 1C, D**).

131

132 We then tested the immunogenicity and antigenicity of our optimized constructs and assessed their  
133 RBM immune-focusing properties, in the murine model. In order to increase avidity and to  
134 minimize any off-target tag-specific responses, we generated trimeric versions of each immunogen  
135 using our previously characterized hyperglycosylated, cysteine-stabilized GCN4 tag (*hgGCN4<sup>cys</sup>*)  
136 (30, 31). We first primed all cohorts with SARS-2 spike to reflect pre-existing SARS-2 immunity  
137 and to imprint an initial RBM response that may be recalled and selectively expanded by our  
138 immunogens. To test potential RBM immune-focusing, one cohort was sequentially immunized  
139 with SARS-2<sup>hg</sup> trimers (“Trimer<sup>hg</sup> cohort”) and a second cohort was immunized with SARS-2<sup>hg</sup>  
140 trimers followed by a cocktail of rsSARS-1<sup>hg</sup> and rsWIV1<sup>hg</sup> (“Cocktail<sup>hg</sup> cohort”) (**Fig. 2A**). In

141 order to compare the efficacy of RBM-focusing, we included a “ $\Delta$ RBM cohort”. This cohort was  
142 immunized with a modified SARS-2 RBD ( $\Delta$ RBM) with four novel glycans engineered at  
143 positions 448, 475, 494, and 501 on the RBM. These PNGs effectively abrogate RBM-directed  
144 B38 antibody binding and engagement of ACE2 (30) and should restrict elicited humoral responses  
145 to this epitope. Finally, as a control cohort, we included a SARS-2 spike prime followed with  
146 sequential immunizations with wildtype (*i.e.*, unmodified) SARS-2 RBD trimer (“Trimer cohort”).  
147

148 Overall, we find that all cohorts elicit robust serum responses to wildtype SARS-2 RBD (**Fig. 2B-**  
149 **C, S5**). In order to specifically evaluate the RBM-directed responses, we compared serum ELISA  
150 titers to wildtype SARS-2 RBD and the SARS-2  $\Delta$ RBM RBD construct. We find that the Trimer<sup>hg</sup>  
151 and Cocktail<sup>hg</sup> cohorts had a significant increase in serum titers to wildtype SARS-2 RBD relative  
152 to SARS-2  $\Delta$ RBM RBD; this was in contrast to the  $\Delta$ RBM and Trimer cohorts (**Fig. 2B,C, S6A,B**).  
153 Across the Trimer<sup>hg</sup> and Cocktail<sup>hg</sup> cohorts, the mean binding loss to the SARS-2  $\Delta$ RBM RBD  
154 relative to wildtype SARS-2 RBD was 64%, indicating that ~64% of serum antibodies are RBM-  
155 directed by this metric (It is possible, however, that our engineered glycans  $\Delta$ RBM construct does  
156 not fully restrict access by all RBM-directed responses with differing angles of approach). The  
157 Cocktail<sup>hg</sup> cohort had a slight increase in RBM focusing relative to the Trimer<sup>hg</sup> cohort. This may  
158 be due to increasing the overall antigenic distance (*i.e.*, sequence difference) between the WIV1  
159 and SARS-1 RBDs relative to SARS-2 while maintaining the identical SARS-2 RBM epitope.  
160 Additionally, we find that the Trimer<sup>hg</sup> and Cocktail<sup>hg</sup> cohorts had significantly lower titers to  
161 SARS-1 and WIV1 RBDs as compared to SARS-2 RBD (**Fig. 2B**). This difference was most  
162 pronounced in the Cocktail<sup>hg</sup> cohort, suggesting that the hyperglycosylation and engineered  
163 mutations within the RBD effectively dampened responses to these conserved, cross-reactive  
164 epitopes that are present outside the RBM. Furthermore, serum titers against the rsSARS-1 and  
165 rsWIV1 RBDs were comparable to SARS-2 RBD, indicating that there is minimal antibody  
166 response directed towards wildtype SARS-1 and WIV1 RBD epitopes in comparison to the SARS-  
167 2 RBM (**Fig. 2D, S6C**). We observed no significant glycan-dependent serum response in either  
168 cohort that used hyperglycosylation (**Fig. S7**). Collectively, these data confirm an enhanced SARS-  
169 2 RBM-focused serum response elicited by our engineered immunogens.

170

171 We next compared the neutralization potency of all cohorts using SARS-1, SARS-2, and WIV1  
172 pseudoviruses, as well as RaTG13-CoV (RaTG13) and SHC014-CoV (SHC014) (25, 32-34).  
173 While all cohorts elicited a potent SARS-2 neutralizing response, notably, the Trimer<sup>hg</sup> and  
174 Cocktail<sup>hg</sup> cohorts also exhibited potent SARS-1, WIV1, RaTG13, and SHC014 pseudovirus  
175 neutralization relative to the Trimer and  $\Delta$ RBM cohorts (**Fig. 3A, S8-9, S6B,D**). This is  
176 particularly noteworthy for the Trimer<sup>hg</sup> cohort as it did not include SARS-1 or WIV1 RBDs in  
177 the immunization regimen. WIV1, RaTG13, and SHC014 in this instance are broadly  
178 representative of possible future emerging sarbecoviruses with pandemic potential (25, 34, 35).  
179 The Trimer cohort lost significant neutralization against RaTG13, SARS-1, WIV1, and SHC014,  
180 and the  $\Delta$ RBM trended towards a loss in neutralization as well, mirroring patterns seen following  
181 SARS-2 infection and immunization in humans, as well as SARS-2 spike-based immunization in  
182 mice (8, 32, 36). While the Trimer<sup>hg</sup> cohort had a significant loss in neutralization against the most  
183 genetically divergent sarbecovirus, SHC014, it retained potency against RaTG13, SARS-1, and  
184 WIV1. Importantly, the Cocktail<sup>hg</sup> had no significant loss in neutralization against either RaTG13  
185 or SHC014, neither of which are vaccine-matched strains (**Fig. 3B, S8-9**).

186  
187 To further epitope map the RBM-focused responses, we performed ELISA-based antibody  
188 competition using cross-reactive antibodies CR3022, S309, ADI-55688, ADI-55689, and ADI-  
189 56046 and WIV1 RBD (**Fig. 3C-D**). The latter two antibodies bind a conserved sarbecovirus RBM  
190 epitope also targeted by the antibody ADG-2, which is currently in clinical development and for  
191 which ADI-55688 is a precursor, and other antibodies with broad sarbecovirus neutralization (13,  
192 14, 37). Competition ELISAs suggest that the cross reactive WIV1-directed responses in the  
193 Trimer<sup>hg</sup> and Cocktail<sup>hg</sup> cohorts focus to the ADG-2-like epitope, as well as to the CR3022 and  
194 S309 epitopes in the Cocktail<sup>hg</sup> cohort (**Fig. 3C-D**). Thus, SARS-2<sup>hg</sup>, rsSARS-1<sup>hg</sup>, and rsWIV1<sup>hg</sup>  
195 RBDs can induce not only potent SARS-2 neutralizing antibodies, but also cross-reactive  
196 antibodies that bind to a conserved RBM epitope (**Fig. S10**). Notably, these results are in contrast  
197 to our previous work showing that a cocktail of sarbecovirus that included SARS-1 and WIV1  
198 RBDs could predominantly focus the antibody response towards the conserved CR3022 and S309  
199 epitopic regions (30).

200

201 Many SARS-2 variants of concern include mutations within the RBM including B.1.1.7, B.1.351  
202 and P.1 first detected in the United Kingdom, South Africa, and Brazil, respectively (**Fig. S11A**).  
203 We therefore asked what the consequence was of enhanced focusing to the RBM and whether the  
204 elicited responses elicited were sensitive to these mutations. Interestingly, serum from the  
205 Cocktail<sup>hg</sup> cohort showed no significant loss of binding to the B.1.351 RBD compared to the  
206 wildtype SARS-2 RBD (**Fig. S11B**). This is in contrast to the control Trimer cohort and the  
207 Trimer<sup>hg</sup> cohort, which showed a significant loss of binding and parallels the observation of  
208 reduced serum binding from human subjects immunized with current SARS-2 vaccines (8, 38, 39).  
209 Second, we tested all sera for neutralization against SARS-2 variant pseudoviruses: B.1.1.7,  
210 B.1.351 and P.1. While the control Trimer cohort and the Trimer<sup>hg</sup> cohort could still neutralize all  
211 pseudoviruses, there was a significant loss of neutralization to the P.1 and B.1.351 variants,  
212 consistent with our ELISA data. In contrast, we find no significant loss of neutralization against  
213 these variants in the Cocktail<sup>hg</sup> and  $\Delta$ RBM cohorts (**Fig. 3E**). For  $\Delta$ RBM cohort, the elicited  
214 responses were likely focused to neutralizing epitopes within the non-RBM RBD (*e.g.*, CR3022,  
215 S309) and therefore were not sensitive to these RBM mutations. However, the neutralizing  
216 response observed in the Cocktail<sup>hg</sup> cohort potentially indicates that substantial immune-focusing  
217 to the RBM may allow for greater recognition (*i.e.*, accommodation) of mutations compared to the  
218 RBM-directed antibody response elicited via infection or vaccination (38, 40).

219  
220 We next isolated SARS-2 RBD-specific IgG<sup>+</sup> B cells from the Trimer, Trimer<sup>hg</sup>, and Cocktail<sup>hg</sup>  
221 cohorts and obtained paired heavy and light chain sequences (**Fig. S12**). Overall, there was a  
222 predominance of IGHV1-42 gene usage across all cohorts, but light chain usage patterns varied  
223 more noticeably between the control Trimer cohort and the Trimer<sup>hg</sup> and Cocktail<sup>hg</sup> cohorts (**Fig.**  
224 **4A**). CDRH3 length was significantly longer in the Trimer<sup>hg</sup> cohort; mean somatic hypermutation  
225 trended towards being higher in the Trimer<sup>hg</sup> and Cocktail<sup>hg</sup> cohorts compared to the Trimer cohort  
226 (**Fig. 4B-C**). We recombinantly expressed representative antibodies from clonally related  
227 populations from the Trimer<sup>hg</sup> and Cocktail<sup>hg</sup> cohorts to test for breadth and to crudely epitope map  
228 (**Fig. 4D, S13; Table S1**). Ab19 and Ab20 were SARS-2 specific, did not bind the  $\Delta$ RBM construct  
229 and did not compete with CR3022, suggesting an RBM-focused epitope. Importantly, Ab15, Ab16,  
230 and Ab17 were exceptionally broad in their reactivity, engaging all coronavirus RBDs tested as  
231 well as the SARS-2 variant B.1.351 (**Fig. 4D**). These antibodies still bound the  $\Delta$ RBM construct



232 and either completely (Ab15) or partially (Ab16, Ab17) competed with CR3022; affinities to the  
233 B.1.351 and  $\Delta$ RBM construct were between ~2-20 fold lower than the affinity to the SARS-2  
234 RBD. These data suggest a conserved epitope that partially overlaps both the CR3022 epitope and  
235 the RBM (**Fig. S10**).

236

237 To further define the epitope targeted by these Abs, we obtained a low-resolution cryo-EM  
238 structure of Ab16 in complex with the SARS-2 spike (**Fig. 4E-G**). The SARS-2 spike is in the  
239 “three RBD up” conformation with density for each RBD to be occupied by an Fab. Consistent  
240 with the reactivity in BLI, Ab16 appears to engage a conserved epitope that partially overlaps with  
241 the CR3022 epitope and encompasses part of the RBM (**Fig. 4E**). This latter observation will likely  
242 sterically interfere with ACE2 binding (**Fig. 4F**). Furthermore, the complex appears to show an  
243 outward rotation of the bound RBD relative to the previously characterized “three RBD up” (PDB  
244 7DX9) conformation (**Fig. 4G**). Indeed, this was previously hypothesized to contribute to SARS-  
245 1 neutralization by CR3022 (28). The Ab16 binding footprint appears to overlap with previously  
246 characterized conserved epitopes targeted by antibodies with broad sarbecovirus neutralization  
247 activity: ADI-56046 and antibodies K288.2 and K398.22 isolated from rhesus macaques (13, 36).  
248 This region is also left unmasked in the Trimer<sup>hg</sup> and Cocktail<sup>hg</sup> cohort boosting immunogens (**Fig.**  
249 **1**), allowing immune focusing to both conserved broadly neutralizing epitopes and the SARS-2  
250 RBM.

251

252 Collectively, our results demonstrate immunogen design approaches that can be leveraged to  
253 enhance RBD, and more specifically, RBM-focused humoral responses. It is a strategy that  
254 maintains protective SARS-2 neutralization while also eliciting humoral responses that recognize  
255 emerging variants and coronaviruses with pandemic potential. Importantly, these design strategies  
256 are not limited to coronaviruses and are adaptable to other viruses as a general approach to elicit  
257 protective responses to conserved epitopes.

258

259 **Acknowledgments:** We thank members of the Schmidt Laboratory for helpful discussions. We  
260 thank Timothy Caradonna and Catherine Jacob-Dolan for critical reading of the manuscript. We  
261 thank Dr. Jason McLellan from University of Texas, Austin for the spike plasmid. We thank Nir  
262 Hacoheh and Michael Farzan for the kind gift of the ACE2 expressing 293T cells.

263  
264 **Funding:** We acknowledge funding from NIH R01s AI146779 (AGS), AI124378, AI137057 and  
265 AI153098 (DL), and a Massachusetts Consortium on Pathogenesis Readiness (MassCPR) grant  
266 (AGS); training grants: NIGMS T32 GM007753 (BMH); T32 AI007245 (JF); F31 AI138368  
267 (MS). A.B.B. is supported by the National Institutes for Drug Abuse (NIDA) Avenir New  
268 Innovator Award DP2DA040254, the MGH Transformative Scholars Program as well as funding  
269 from the Charles H. Hood Foundation (ABB). This independent research was supported by the  
270 Gilead Sciences Research Scholars Program in HIV (ABB).

271

272

273 **Author contributions:** Conceptualization, BMH, AGS; Methodology, BMH, ECL, IWW, ABB,  
274 DL, AGS; Investigation, BMH, MS, KS, ECL, JF, TK, IWW; Writing – Original Draft, BMH and  
275 AGS; Writing – Review and Editing, all authors; Funding Acquisition, ABB, DL, AGS;  
276 Supervision, ABB, DL, AGS.; **Competing interests:** Authors declare no competing interests.; and  
277 **Data and materials availability:** All data is available in the main text or in the supplementary  
278 materials.

279

280 **Supplementary Materials:**

281 Materials and Methods

282 Figs. S1 to S14

283 Table S1

284 References (41-51)

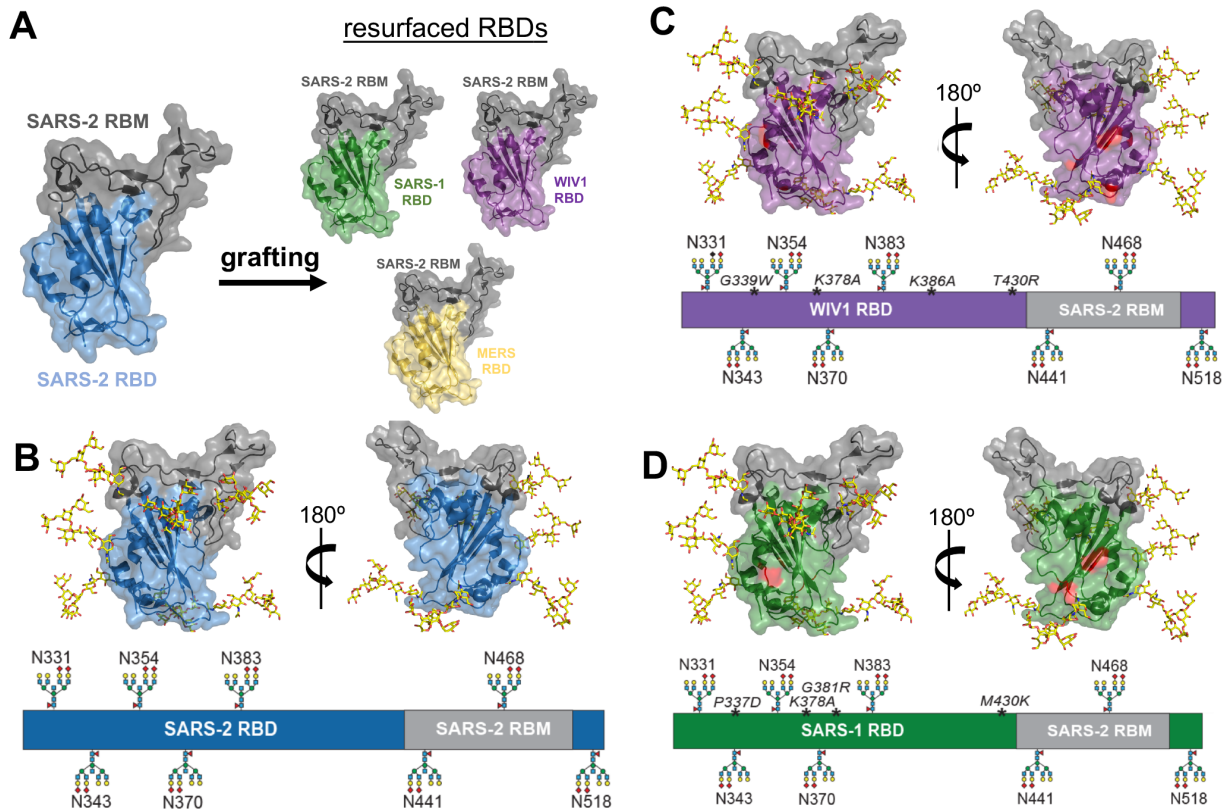

285

286

287 **Fig. 1. Resurfacing and hyperglycosylation approaches for immune-focusing.** (A) Design schematic  
288 for resurfacing SARS-1 (rsSARS-1) and WIV1 (rsWIV1) with the SARS-2 receptor binding motif (RBM).  
289 Design schematic for hyperglycosylating SARS-2 (B), rsSARS-1 (C) and rsWIV1 (D) receptor binding  
290 domains (RBDs). Non-native engineered glycans and native glycans are modeled; native SARS-2 RBM  
291 glycan at position 331 is omitted in the schematic. Mutations in the WIV1 and SARS-1 RBDs are shown  
292 in red and italicized in the linear diagram. All images were created using PDB 6M0J.

293

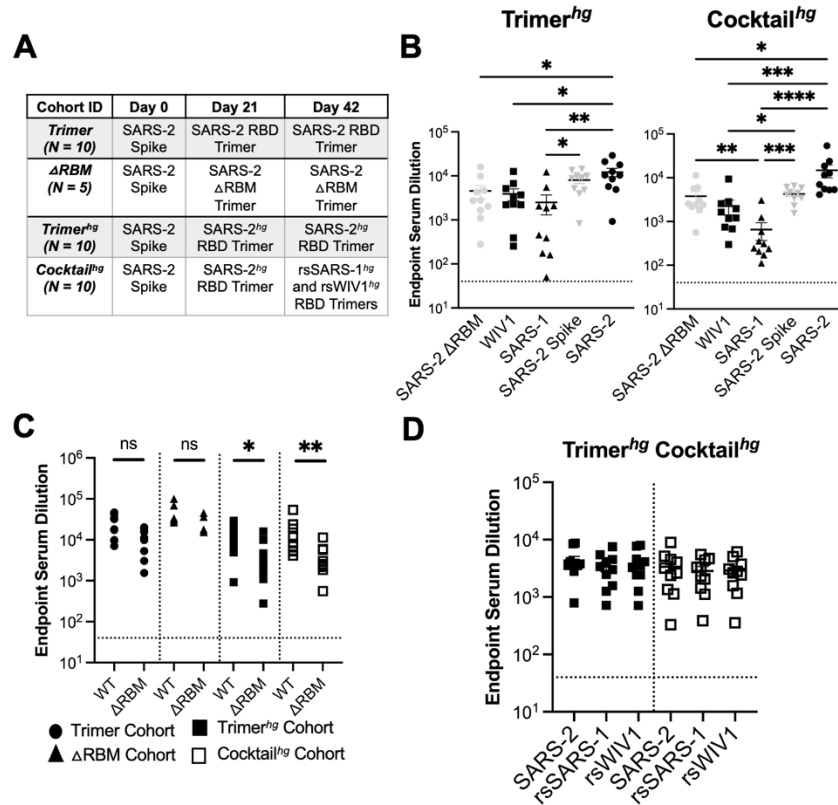

294

295

296 **Fig. 2. Serum analysis from cohorts.** (A) Schematic of immunization cohorts; N= number of mice in  
 297 each cohort (B, C) Serum following immunizations was assayed in ELISA at day 56 with different  
 298 coronavirus antigens. Statistical significance was determined using Kruskal-Wallis test with post-hoc  
 299 analysis using Dunn's test corrected for multiple comparisons or Mann-Whitney U test (\* =  $p < 0.05$ , \*\* =  
 300  $p < 0.01$ , \*\*\* =  $p < 0.001$ , \*\*\*\* =  $p < 0.0001$ ). (D) Day 56 serum samples assayed against rsSARS-1 and  
 301 rsWIV1 RBDs no longer show statistically significant differences in binding compared to SARS-2 RBD as  
 302 determined using Kruskal-Wallis test with post-hoc analysis using Dunn's test corrected for multiple  
 303 comparisons.

304

305

306

307

308

309

310

311

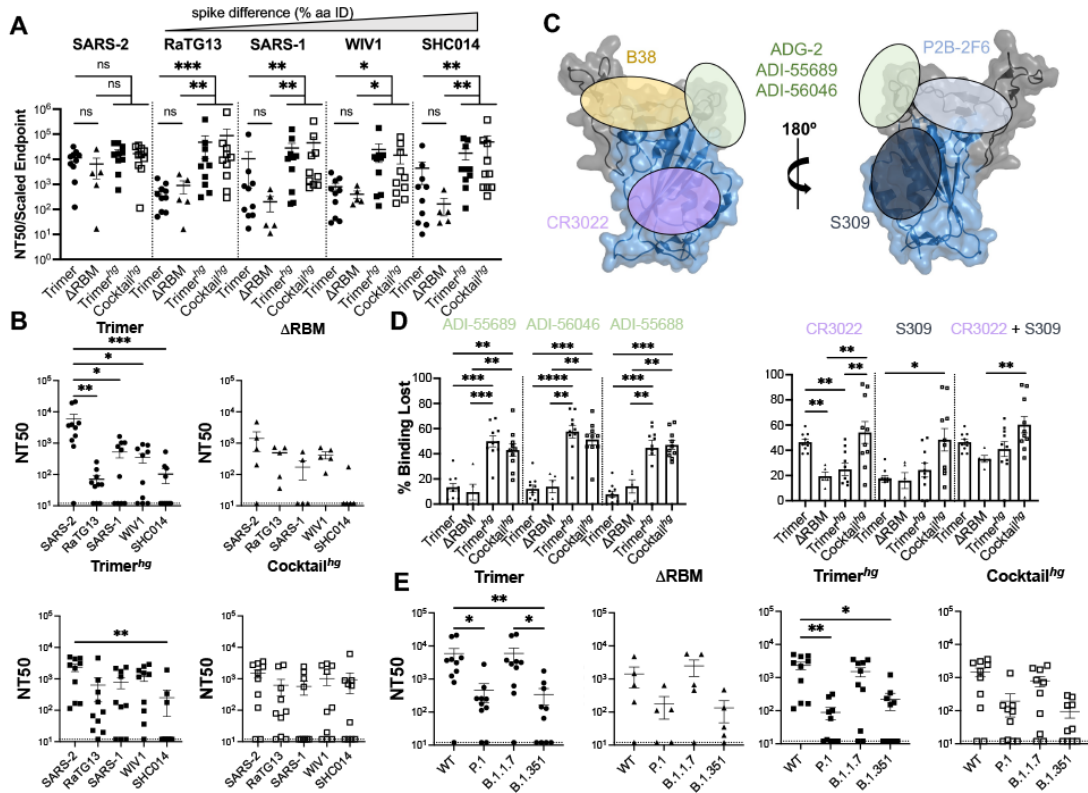

312

313

314 **Fig. 3. Potency and characterization of SARS-like coronavirus neutralization response.** (A) Day 56  
 315 serum from all mice was assayed for neutralization against SARS-2, RaTG13, SARS-1, WIV1, and  
 316 SHC014 pseudoviruses (arranged in order of genetic similarity of the full-length spike to SARS-2).  
 317 Neutralization potency was computed using scaled endpoint serum ELISA titers. Statistical significance  
 318 was determined using the Kruskal-Wallis test with post-hoc analysis using Dunn's test corrected for  
 319 multiple comparisons (\* =  $p < 0.05$ , \*\* =  $p < 0.01$ , \*\*\* =  $p < 0.001$ , ns = not significant). (B) Day 56 serum  
 320 from all mice was assayed for neutralization against SARS-2, RaTG13, SARS-1, WIV1, and SHC014  
 321 pseudoviruses. Statistical significance was determined using the Kruskal-Wallis test with post-hoc analysis  
 322 using Dunn's test corrected for multiple comparisons (\* =  $p < 0.05$ , \*\* =  $p < 0.01$ , \*\*\* =  $p < 0.001$ ). (C)  
 323 Approximate locations of representative antibody epitopes from each of the four SARS-2 RBD-directed  
 324 antibody classes (21) and ADG-2-like antibodies on the SARS-2 RBD. (PDB: 6M0J) (D) Antibody  
 325 competition ELISAs with WIV1 RBD as the coating antigen. Bars show the mean percent binding lost,  
 326 with error bars representing the standard error of the mean. Comparisons were performed using the Kruskal-  
 327 Wallis test with post-hoc analysis using Dunn's test corrected for multiple comparisons (\* =  $p < 0.05$ , \*\*  $p$   
 328  $< 0.01$ , \*\*\* =  $p < 0.001$ , \*\*\*\* =  $p < 0.0001$ ). (E) Day 56 serum was assayed against SARS-2 variant  
 329 pseudoviruses for neutralization. Statistical significance was determined using the Kruskal-Wallis test with  
 330 post-hoc analysis using Dunn's test corrected for multiple comparisons (\* =  $p < 0.05$ , \*\* =  $p < 0.01$ ).

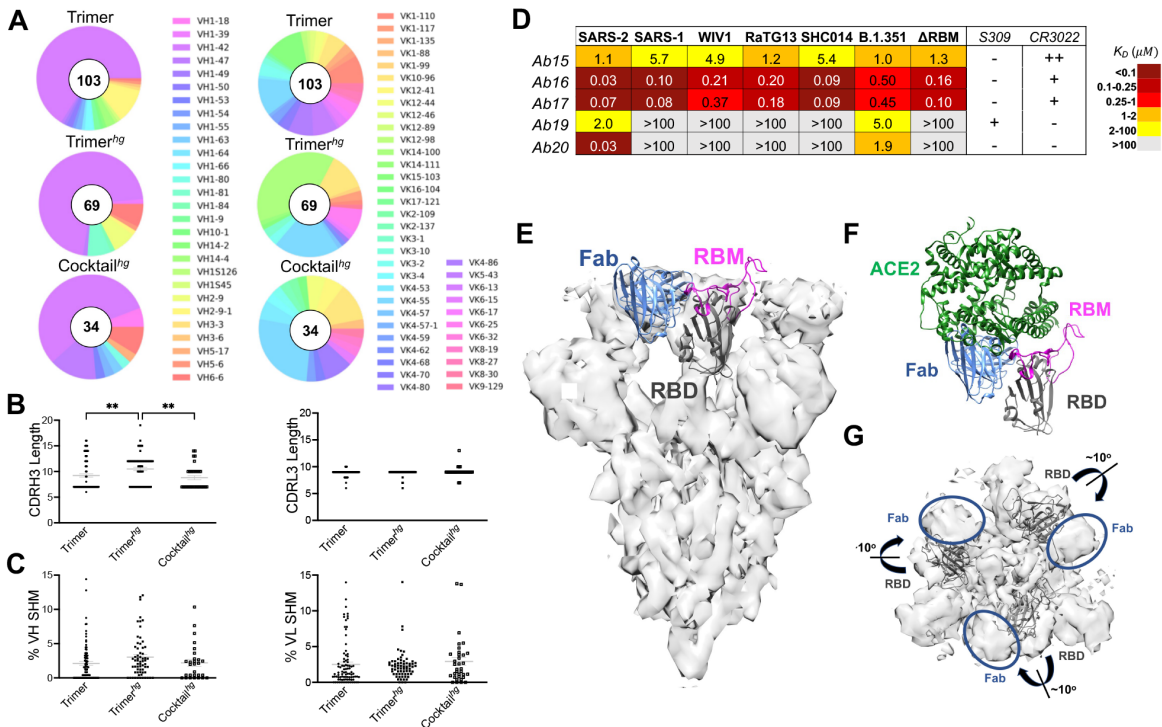

331

332

333 **Fig. 4. SARS-2 RBD-directed B cell characteristics.** Splens were harvested at day 63 and  
 334 SARS-2 RBD-directed IgG<sup>+</sup> B cells were isolated via flow cytometry. B cell receptor sequencing  
 335 was used to characterize (A) heavy and light chain V-gene usage. All gene families listed are \*01  
 336 except VH1-84\*02. Complementarity determining region 3 (CDR3) length (B) and percent  
 337 somatic hypermutation (SHM) (C) were also analyzed for each sequence. SHM was not analyzed  
 338 for cohorts with uncertain IMGT V-gene assignments. Statistical significance was determined  
 339 using the Kruskal-Wallis test with post-hoc analysis using Dunn's test corrected for multiple  
 340 comparisons (\* =  $p < 0.05$ , \*\* =  $p < 0.01$ ). (D) Antibodies representative of lineages that were  
 341 expanded in RBM-focusing cohorts were expressed recombinantly as Fabs, and their binding was  
 342 characterized via BLI (E) low resolution cryoEM map with model of Ab16 as Fab (blue) bound to  
 343 RBD (gray) with the RBM (magenta) shown (RBD is from PDB 7DX9); for ease of viewing only  
 344 a single RBD and Fab are shown. (F) Model from (E) with docked ACE-2 (from PDB 6M0J) (G)  
 345 cryoEM map with 3 RBDs (gray) in ribbon and the Fab Ab16 removed to show its density and the  
 346 slight outward rotation of the RBD required to better fit the density compared to the docked 3 RBD  
 347 up conformation from PDB 7DX9.

348

## 349 MATERIALS AND METHODS

350

### 351 Immunogen and Coating Protein Expression and Purification

352 The SARS-CoV-2 (Genbank MN975262.1), SARS-CoV (Genbank ABD72970.1), WIV1-CoV  
353 (Genbank AGZ48828.1) RBDs were used as the basis for constructing these immunogens. To graft  
354 the SARS-2 RBM onto SARS-1 and WIV1 scaffolds to create the rsSARS-1 and rsWIV1  
355 monomers, boundaries of SARS-2 residues 437 – 507 were used. All constructs were codon  
356 optimized by Integrated DNA Technologies and purchased as gblocks. Gblocks were then cloned  
357 into pVRC and sequence confirmed via Genewiz. Monomeric constructs for serum ELISA coating  
358 contained C-terminal HRV 3C-cleavable 8xHis and SBP tags. Trimeric constructs also included  
359 C-terminal HRV 3C-cleavable 8xHis tags, in addition to a previously published hyperglycosylated  
360 GCN4 tag with two engineered C-terminal cystines (30, 31). Dr. Jason McLellan at the University  
361 of Texas, Austin provided the spike plasmid, which contained a non-cleavable foldon trimerization  
362 domain in addition to C-terminal HRV 3C cleavable 6xHis and 2xStrep II tags. The SARS-2  
363  $\Delta$ RBM RBD construct was generated as previously described with four additional engineered  
364 putative N-linked glycosylation sites at positions 448, 475, 494, and 501 (30).

365

366 Expi 293F cells (ThermoFisher) were used to express proteins. Transfections were performed with  
367 Expifectamine reagents per the manufacturer's protocol. After 5-7 days, transfections were  
368 harvested and centrifuged for clarification. Cobalt-TALON resin (Takara) was used to perform  
369 immobilized metal affinity chromatography via the 8xHis tag. Proteins were eluted using  
370 imidazole, concentrated, and passed over a Superdex 200 Increase 10/300 GL (GE Healthcare)  
371 size exclusion column. Size exclusion chromatography was performed in PBS (Corning). For  
372 immunogens, HRV 3C protease (ThermoScientific) cleavage of affinity tags was performed prior  
373 to immunization. Cobalt-TALON resin was used for a repurification to remove the His-tagged  
374 HRV 3C protease, cleaved tag, and remaining uncleaved protein.

375

### 376 Fab and IgG Expression and Purification

377 The variable heavy and light chain genes for each antibody were codon optimized by Integrated  
378 DNA Technologies, purchased as gblocks, and cloned into pVRC constructs which already  
379 contained the appropriate constant domains as previously described (41, 42). The Fab heavy chain

380 vector contained a HRV 3C-cleavable 8xHis tag, and the IgG heavy chain vector contained HRV  
381 3C-cleavable 8xHis and SBP tags. The same transfection and purification protocol as used for the  
382 immunogens and coating proteins was used for the Fabs and IgGs.

383

#### 384 Biolayer Interferometry

385 Biolayer interferometry (BLI) experiments were performed using a BLItz instrument (Fortebio)  
386 with FAB2G biosensors or Ni-NTA biosensors (Fortebio). All proteins were diluted in PBS. Fabs  
387 were immobilized to the biosensors, and coronavirus proteins were used as the analytes. To  
388 determine binding affinities, single-hit measurements were performed starting at 10  $\mu\text{M}$  to  
389 calculate an approximate  $K_D$  in order to evaluate which concentrations should be used for  
390 subsequent titrations. Measurements at a minimum of three additional concentrations were  
391 performed. Vendor-supplied software was used to generate a final  $K_D$  estimate via a global fit  
392 model with a 1:1 binding isotherm.

393

#### 394 Immunizations

395 All immunizations were performed using female C57BL/6 mice (Jackson Laboratory) aged 6-10  
396 weeks. Mice received 20  $\mu\text{g}$  of protein adjuvanted with 50% w/v Sigma adjuvant in 100  $\mu\text{L}$  of  
397 inoculum via the intraperitoneal route. Following an initial prime (day 0), boosts occurred at days  
398 21 and 42. Serum samples were collected for characterization on day 56 from all cohorts, in  
399 addition to day 35 for the Trimer<sup>hg</sup> and Cocktail<sup>hg</sup> cohorts. All experiments were conducted with  
400 institutional IACUC approval (MGH protocol 2014N000252).

401

#### 402 Serum ELISAs

403 Serum ELISAs were executed using 96-well, clear, flat-bottom, high bind microplates (Corning).  
404 These plates were coated with 100  $\mu\text{L}$  of protein, which were adjusted to a concentration of 5  
405  $\mu\text{g}/\text{mL}$  (in PBS). Plates were incubated overnight at 4°C. After incubation, plates had their coating  
406 solution removed and were blocked using 1% BSA in PBS with 1% Tween. This was done for 60  
407 minutes at room temperature. This blocking solution was removed, and sera was diluted 40-fold  
408 in PBS. A 5-fold serial dilution was then performed. CR3022 IgG, similarly serially diluted (5-  
409 fold) from a 5  $\mu\text{g}/\text{mL}$  starting concentration, was used as a positive control. 40  $\mu\text{L}$  of primary  
410 antibody solution was used per well. Following this, samples were incubated for 90 minutes at



411 room temperature. Plates were washed three times using PBS-Tween. 150  $\mu$ L of HRP-conjugated  
412 rabbit anti-mouse IgG antibody, sourced commercially from Abcam (at a 1:20,000 dilution in  
413 PBS), was used for the secondary incubation. Secondary incubation was performed for one hour,  
414 similarly at room temperature. Plates were subsequently washed three times using PBS-Tween.  
415 1xABTS development solution (ThermoFisher) was used according to the manufacturer's  
416 protocol. Development was abrogated after 30 minutes using a 1% SDS solution, and plates were  
417 read using a SpectraMaxiD3 plate reader (Molecular Devices) for absorbance at 405 nm.

418

#### 419 Competition ELISAs

420 A similar protocol to the serum ELISAs was used for the competition ELISAs. For the primary  
421 incubation, 40  $\mu$ L of the relevant IgG at 1  $\mu$ M was used at room temperature for 60 minutes. Mouse  
422 sera were then spiked in such that the final concentration of sera fell within the linear range for the  
423 serum ELISA titration curve for the respective coating antigen, and an additional 60 minutes of  
424 room temperature incubation occurred. After removing the primary solution, plates were washed  
425 three times with PBS-Tween. Secondary incubation consisted of HRP-conjugated goat anti-mouse  
426 IgG, human/bovine/horse SP ads antibody (Southern Biotech) at a concentration of 1:4000. The  
427 remaining ELISA procedure (secondary incubation, washing, developing) occurred as described  
428 for the serum ELISAs. Percent binding loss was calculated relative to a no IgG control. Negative  
429 percent binding loss values were set to zero for the purpose of visualizations.

430

#### 431 ACE2 Cell Binding Assay

432 ACE2 expressing 293T cells (43) (a kind gift from Nir Hacohen and Michael Farzan) were  
433 harvested. A wash was performed using PBS supplemented with 2% FBS. 200,000 cells were  
434 allocated to each labelling condition. Primary incubation occurred using 100  $\mu$ L of 1  $\mu$ M antigen  
435 in PBS on ice for 60 minutes. Two washes were performed with PBS supplemented with 2% FBS.  
436 Secondary incubation was performed using 50  $\mu$ L of 1:200 streptavidin-PE (Invitrogen) on ice for  
437 30 mins. Two washes were performed with PBS supplemented with 2% FBS, and then cells were  
438 resuspended in 100  $\mu$ L of PBS supplemented with 2% FBS. A Stratadigm S1000Exi Flow  
439 Cytometer was used to perform flow cytometry. FlowJo (version 10) was used to analyze FCS  
440 files.

441

#### 442 Pseudovirus Neutralization Assay

443 Serum neutralization against SARS-CoV-2, SARS-CoV, WIV1-CoV, RaTG13, and SHC014 was  
444 assayed using pseudotyped lentiviral particles expressing spike proteins described previously (32).  
445 Transient transfection of 293T cells was used to generate lentiviral particles. Viral supernatant  
446 titers were measured using flow cytometry of 293T-ACE2 cells (43) and utilizing the HIV-1 p24<sup>CA</sup>  
447 antigen capture assay (Leidos Biomedical Research, Inc.). 384-well plates (Grenier) were used to  
448 perform assays on a Tecan Fluent Automated Workstation. For mouse sera, samples underwent  
449 primary dilutions of 1:3 or 1:9 followed by serial 3-fold dilutions. 20  $\mu$ L each of sera and  
450 pseudovirus (125 infectious units) were loaded into each well. Plates were then incubated for 1  
451 hour at room temperature. Following incubation, 10,000 293T-ACE2 cells (43) in 20  $\mu$ L of media  
452 containing 15  $\mu$ g/mL polybrene was introduced to each well. The plates were then further  
453 incubated at 37°C for 60-72 hours.

454  
455 Cells were lysed using assay buffers described previously (44). Luciferase expression was  
456 quantified using a Spectramax L luminometer (Molecular Devices). Neutralization percentage for  
457 each concentration of serum was calculated by deducting background luminescence from cells-  
458 only sample wells and subsequently dividing by the luminescence of wells containing both virus  
459 and cells. Nonlinear regressions were fitted to the data using GraphPad Prism (version 9), allowing  
460 IC<sub>50</sub> values to be calculated via the interpolated 50% inhibitory concentration. IC<sub>50</sub> values were  
461 calculated with a neutralization values greater than or equal to 80% at maximum serum  
462 concentration for each sample. NT<sub>50</sub> values were then calculated using the reciprocal of IC<sub>50</sub>  
463 values. Serum neutralization potency values were calculated by dividing the NT<sub>50</sub> against a  
464 particular pseudovirus by the endpoint titer against the respective RBD. For samples with NT<sub>50</sub>  
465 values below the limit of detection, the lowest limit of detection across all neutralization assays  
466 was used as the NT<sub>50</sub> value to calculate neutralization potency. This prevents a higher limit of  
467 detection from skewing neutralization potency results. Endpoint titers were normalized relative to  
468 a CR3022 IgG control, which was run in every serum ELISA. ELISA titers that were too low to  
469 calculate an endpoint titer were set to 40, which was the starting point for the serum dilutions.

470  
471 In comparing NT<sub>50</sub> values for the various cohorts across the wildtype and variant pseudoviruses,  
472 the lowest limit of detection across all neutralization assays performed for a given cohort was used

473 for any NT50 values that fell below the limit of detection. This prevents a higher limit of detection  
474 in some assays from skewing the comparison results.

475

#### 476 Flow Cytometry

477 Single cell suspensions were generated from mouse spleens following isolation via straining  
478 through a 70  $\mu\text{m}$  cell strainer. Treatment with ACK lysis buffer was performed to remove red  
479 blood cells, and cells were washed with PBS. Aqua Live/Dead amine-reactive dye (0.025 mg/mL)  
480 was first used to stain single cell suspensions. The following B and T cell staining panel of mouse-  
481 specific antibodies was then applied: CD3-BV786 (BioLegend), CD19-BV421 (BioLegend), IgM-  
482 BV605 (BioLegend), IgG-PerCP/Cy5.5 (BioLegend). Staining was performed using a previously  
483 described staining approach (45, 46).

484

485 SBP-tagged coronavirus proteins were labelled using streptavidin-conjugated fluorphores as  
486 previously described (47). Briefly, a final conjugated probe concentration of 0.1  $\mu\text{g}/\text{mL}$  was  
487 achieved following the addition of streptavidin conjugates to achieve a final molar ratio of probe  
488 to streptavidin valency of 1:1. This addition was performed in 5 increments with 20 minutes of  
489 incubation at 4°C with rotation in between. The coronavirus protein panel consisted of the  
490 following fluorescent probes: SARS-CoV-2 RBD-APC/Cy7 (streptavidin-APC/Cy7 from  
491 BioLegend), WIV1 RBD-BV650 (streptavidin-BV650 from BioLegend), SARS-CoV-2 spike-  
492 StrepTactin PE (StrepTactin PE from IBA Lifesciences), and SARS-CoV-2 spike-StrepTactin  
493 APC (StrepTactin APC from IBA Lifesciences).

494

495 A BD FACSAria Fusion cytometer (BD Biosciences) was used to perform flow cytometry. FlowJo  
496 (version 10) was used to analyze the resultant FCS files. Sorted cells were IgG<sup>+</sup> B cells that were  
497 double-positive for SARS-CoV-2 spike and positive for the SARS-CoV-2 RBD.

498

#### 499 B Cell Receptor Sequencing

500 Cells were sorted into 96-well plates containing 4  $\mu\text{L}$  of lysis buffer, consisting of 0.5X PBS, 10  
501 mM DTT, and 4 units of RNaseOUT (ThermoFisher). Following sorting, plates were spun down  
502 at 3000g for 1 minute and stored at -80°C. Plates were later thawed and a reverse transcriptase  
503 reaction was performed using the SuperScript IV VILO MasterMix (ThermoFisher) in a total

504 volume of 20  $\mu$ L according to the manufacturer's recommendations. Two rounds of PCR were  
505 then performed using previously published primers (48, 49). Variable heavy and light chains were  
506 then sequenced via Sanger sequencing (Genewiz).

507  
508 IMGT High V-Quest was used to analyze variable heavy and light chain sequences, and IgBlast  
509 was used to identify clonal lineages. Data were plotted using Python.

510

#### 511 Cryo-EM Grid Preparation and Image Recording.

512 Complexes of SARS-CoV-2 spike (6P) with Ab16 Fab were formed by combining spike at 0.7  
513 mg/mL with Fab at 0.6 mg/mL (three-fold excess of binding sites) in a buffer composed of 10 mM  
514 Tris pH 7.5 with 150 mM NaCl. Spike·Fab complexes were incubated for 30 minutes on ice before  
515 application to thick C-flat 1.2-1.3 400 Cu mesh grids (Protochips). Grids were glow discharged  
516 (PELCO easiGlow) for 30 seconds at 15 mA and prepared with a Gatan Cryoplunge 3 by applying  
517 3.8  $\mu$ L of sample and blotting for 4.0 seconds in the chamber maintained at a humidity between  
518 88% and 92%. Images for Spike complexes with Ab16 were recorded on a Talos Arctica  
519 microscope operated at 200 keV with a Gatan K3 direct electron detector. Automated image  
520 acquisition was performed with Serial EM (50).

521

#### 522 Cryo-EM Image Analysis and 3D Reconstruction and Model Fitting

523 Image analysis for was carried out in RELION as previously. Briefly, particles were extracted from  
524 motion-corrected micrographs and subjected to 2D classification, initial 3D model generation, 3D  
525 classification, and 3D refinement. 2D class averages are shown in **Fig. S14**. Ab16 was C3  
526 symmetric. CTF refinement was performed to correct beam tilt, trefoil, anisotropic magnification,  
527 and per particle defocus in RELION (51). Bayesian polishing was also performed in RELION  
528 leading to a 6.6  $\text{\AA}$  reconstruction following 3D refinement. The final 3D refined map was  
529 sharpened with a B-factor of  $-297.5 \text{\AA}^2$  resulting in a 5.5  $\text{\AA}$  resolution map as determined by the  
530 Fourier shell correlation (0.143 cutoff). Heavy and light chains of PDB entries 4L5F and 4HC1  
531 were aligned and extracted to make an initial model for the Fab. Spike with 3 RBD in the "up"  
532 conformation (PDB 7DX9) and model of Ab16 Fab were docked into the cryoEM map using  
533 Chimera.

534

535 Statistical Analysis

536 Curve fitting and statistical analyses were performed with GraphPad Prism (version 9). Non-  
537 parametric statistics were used throughout. To compare multiple populations, the Kruskal-Wallis  
538 non-parametric ANOVA was used with post hoc analysis using Dunn's test for multiple  
539 comparisons. The Mann-Whitney U test was used to compare two populations without  
540 consideration for paired samples. The ratio-paired t-test was used to compare two populations with  
541 consideration for paired samples and evidence of normality. P values in ANOVA analyses were  
542 corrected for multiple comparisons. A p value < 0.05 was considered significant.

543 **REFERENCES**

544

- 545 1. J. Overbaugh, L. Morris, The Antibody Response against HIV-1. *Cold Spring Harb*  
546 *Perspect Med* **2**, a007039 (2012).
- 547 2. F. Krammer, The human antibody response to influenza A virus infection and  
548 vaccination. *Nat Rev Immunol* **19**, 383-397 (2019).
- 549 3. K. A. Callow, H. F. Parry, M. Sergeant, D. A. Tyrrell, The time course of the immune  
550 response to experimental coronavirus infection of man. *Epidemiol Infect* **105**, 435-446  
551 (1990).
- 552 4. J. O. Hendley, H. B. Fishburne, J. M. Gwaltney, Jr., Coronavirus infections in working  
553 adults. Eight-year study with 229 E and OC 43. *Am Rev Respir Dis* **105**, 805-811 (1972).
- 554 5. A. S. Monto, S. K. Lim, The Tecumseh study of respiratory illness. VI. Frequency of and  
555 relationship between outbreaks of coronavirus infection. *J Infect Dis* **129**, 271-276  
556 (1974).
- 557 6. R. T. Eguia *et al.*, A human coronavirus evolves antigenically to escape antibody  
558 immunity. *PLoS Pathog* **17**, e1009453 (2021).
- 559 7. C. K. Wibmer *et al.*, SARS-CoV-2 501Y.V2 escapes neutralization by South African  
560 COVID-19 donor plasma. *Nat Med*, (2021).
- 561 8. W. F. Garcia-Beltran *et al.*, Multiple SARS-CoV-2 variants escape neutralization by  
562 vaccine-induced humoral immunity. *Cell*, (2021).
- 563 9. D. Zhou *et al.*, Evidence of escape of SARS-CoV-2 variant B.1.351 from natural and  
564 vaccine-induced sera. *Cell*, (2021).
- 565 10. P. Supasa *et al.*, Reduced neutralization of SARS-CoV-2 B.1.1.7 variant by convalescent  
566 and vaccine sera. *Cell*, (2021).
- 567 11. D. Planas *et al.*, Sensitivity of infectious SARS-CoV-2 B.1.1.7 and B.1.351 variants to  
568 neutralizing antibodies. *Nat Med*, (2021).
- 569 12. D. R. Martinez *et al.*, Chimeric spike mRNA vaccines protect against sarbecovirus  
570 challenge in mice. *Science*, (2021).
- 571 13. A. Z. Wec *et al.*, Broad neutralization of SARS-related viruses by human monoclonal  
572 antibodies. *Science* **369**, 731-736 (2020).
- 573 14. C. G. Rappazzo *et al.*, Broad and potent activity against SARS-like viruses by an  
574 engineered human monoclonal antibody. *Science* **371**, 823-829 (2021).
- 575 15. G. Bajic *et al.*, Influenza Antigen Engineering Focuses Immune Responses to a  
576 Subdominant but Broadly Protective Viral Epitope. *Cell Host Microbe* **25**, 827-835 e826  
577 (2019).
- 578 16. G. Bajic *et al.*, Structure-Guided Molecular Grafting of a Complex Broadly Neutralizing  
579 Viral Epitope. *ACS Infect Dis* **6**, 1182-1191 (2020).
- 580 17. M. Crispin, A. B. Ward, I. A. Wilson, Structure and Immune Recognition of the HIV  
581 Glycan Shield. *Annu Rev Biophys* **47**, 499-523 (2018).
- 582 18. G. Ofek *et al.*, Elicitation of structure-specific antibodies by epitope scaffolds. *Proc Natl*  
583 *Acad Sci U S A* **107**, 17880-17887 (2010).
- 584 19. B. E. Correia *et al.*, Proof of principle for epitope-focused vaccine design. *Nature* **507**,  
585 201-206 (2014).
- 586 20. L. Piccoli *et al.*, Mapping Neutralizing and Immunodominant Sites on the SARS-CoV-2  
587 Spike Receptor-Binding Domain by Structure-Guided High-Resolution Serology. *Cell*  
588 **183**, 1024-1042 e1021 (2020).

- 589 21. C. O. Barnes *et al.*, SARS-CoV-2 neutralizing antibody structures inform therapeutic  
590 strategies. *Nature* **588**, 682-687 (2020).
- 591 22. Y. Wu *et al.*, A noncompeting pair of human neutralizing antibodies block COVID-19  
592 virus binding to its receptor ACE2. *Science* **368**, 1274-1278 (2020).
- 593 23. J. Hansen *et al.*, Studies in humanized mice and convalescent humans yield a SARS-  
594 CoV-2 antibody cocktail. *Science* **369**, 1010-1014 (2020).
- 595 24. M. Letko, A. Marzi, V. Munster, Functional assessment of cell entry and receptor usage  
596 for SARS-CoV-2 and other lineage B betacoronaviruses. *Nat Microbiol* **5**, 562-569  
597 (2020).
- 598 25. J. Shang *et al.*, Structural basis of receptor recognition by SARS-CoV-2. *Nature* **581**,  
599 221-224 (2020).
- 600 26. V. S. Raj *et al.*, Dipeptidyl peptidase 4 is a functional receptor for the emerging human  
601 coronavirus-EMC. *Nature* **495**, 251-254 (2013).
- 602 27. D. Pinto *et al.*, Cross-neutralization of SARS-CoV-2 by a human monoclonal SARS-CoV  
603 antibody. *Nature* **583**, 290-295 (2020).
- 604 28. M. Yuan *et al.*, A highly conserved cryptic epitope in the receptor binding domains of  
605 SARS-CoV-2 and SARS-CoV. *Science* **368**, 630-633 (2020).
- 606 29. N. C. Wu *et al.*, A natural mutation between SARS-CoV-2 and SARS-CoV determines  
607 neutralization by a cross-reactive antibody. *PLoS Pathog* **16**, e1009089 (2020).
- 608 30. B. M. Hauser *et al.*, Engineered receptor binding domain immunogens elicit pan-  
609 coronavirus neutralizing antibodies. *bioRxiv*, (2020).
- 610 31. K. Sliepen, T. van Montfort, M. Melchers, G. Isik, R. W. Sanders, Immunosilencing a  
611 highly immunogenic protein trimerization domain. *J Biol Chem* **290**, 7436-7442 (2015).
- 612 32. W. F. Garcia-Beltran *et al.*, COVID-19-neutralizing antibodies predict disease severity  
613 and survival. *Cell* **184**, 476-488 e411 (2021).
- 614 33. K. H. D. Crawford *et al.*, Protocol and Reagents for Pseudotyping Lentiviral Particles  
615 with SARS-CoV-2 Spike Protein for Neutralization Assays. *Viruses* **12**, (2020).
- 616 34. V. D. Menachery *et al.*, A SARS-like cluster of circulating bat coronaviruses shows  
617 potential for human emergence. *Nat Med* **21**, 1508-1513 (2015).
- 618 35. V. D. Menachery *et al.*, SARS-like WIV1-CoV poised for human emergence. *Proc Natl*  
619 *Acad Sci U S A* **113**, 3048-3053 (2016).
- 620 36. W. T. He *et al.*, Broadly neutralizing antibodies to SARS-related viruses can be readily  
621 induced in rhesus macaques. *bioRxiv*, (2021).
- 622 37. D. R. Martinez *et al.*, A broadly neutralizing antibody protects against SARS-CoV, pre-  
623 emergent bat CoVs, and SARS-CoV-2 variants in mice. *bioRxiv*, (2021).
- 624 38. D. Zhou *et al.*, Evidence of escape of SARS-CoV-2 variant B.1.351 from natural and  
625 vaccine induced sera. *Cell*, (2021).
- 626 39. Z. Wang *et al.*, mRNA vaccine-elicited antibodies to SARS-CoV-2 and circulating  
627 variants. *Nature* **592**, 616-622 (2021).
- 628 40. M. Yuan *et al.*, Structural and functional ramifications of antigenic drift in recent SARS-  
629 CoV-2 variants. *Science*, (2021).
- 630 41. A. G. Schmidt *et al.*, Immunogenic Stimulus for Germline Precursors of Antibodies that  
631 Engage the Influenza Hemagglutinin Receptor-Binding Site. *Cell Rep* **13**, 2842-2850  
632 (2015).
- 633 42. A. G. Schmidt *et al.*, Viral receptor-binding site antibodies with diverse germline origins.  
634 *Cell* **161**, 1026-1034 (2015).

- 635 43. M. J. Moore *et al.*, Retroviruses pseudotyped with the severe acute respiratory syndrome  
636 coronavirus spike protein efficiently infect cells expressing angiotensin-converting  
637 enzyme 2. *J Virol* **78**, 10628-10635 (2004).
- 638 44. E. Siebring-van Olst *et al.*, Affordable luciferase reporter assay for cell-based high-  
639 throughput screening. *J Biomol Screen* **18**, 453-461 (2013).
- 640 45. M. Sangesland *et al.*, Germline-Encoded Affinity for Cognate Antigen Enables Vaccine  
641 Amplification of a Human Broadly Neutralizing Response against Influenza Virus.  
642 *Immunity* **51**, 735-749 e738 (2019).
- 643 46. G. C. Weaver *et al.*, In vitro reconstitution of B cell receptor-antigen interactions to  
644 evaluate potential vaccine candidates. *Nat Protoc* **11**, 193-213 (2016).
- 645 47. N. Kaneko *et al.*, Loss of Bcl-6-Expressing T Follicular Helper Cells and Germinal  
646 Centers in COVID-19. *Cell* **183**, 143-157 e113 (2020).
- 647 48. S. Rohatgi, P. Ganju, D. Sehgal, Systematic design and testing of nested (RT-)PCR  
648 primers for specific amplification of mouse rearranged/expressed immunoglobulin  
649 variable region genes from small number of B cells. *J Immunol Methods* **339**, 205-219  
650 (2008).
- 651 49. T. Tiller, C. E. Busse, H. Wardemann, Cloning and expression of murine Ig genes from  
652 single B cells. *J Immunol Methods* **350**, 183-193 (2009).
- 653 50. D. N. Mastronarde, Automated electron microscope tomography using robust prediction  
654 of specimen movements. *J Struct Biol* **152**, 36-51 (2005).
- 655 51. S. H. Scheres, RELION: implementation of a Bayesian approach to cryo-EM structure  
656 determination. *J Struct Biol* **180**, 519-530 (2012).
- 657
